# Supplementary material for: Estimating indirect parental genetic effects on offspring phenotypes using virtual parental genotypes derived from sibling and half sibling pairs
Source: PLoS Genet. 2020 Oct 26;16(10):e1009154. doi: 10.1371/journal.pgen.1009154 (PMC7646364; doi:10.1371/journal.pgen.1009154)
Supplement: S8 Table — Power (a -d) and type 1 error rate (e—h) for tests involving male sibling pairs on the X chromosome. Results of simulations compared to asymptotic calculations (α = 0.05). (XLSX) [file pgen.1009154.s010.xlsx]

## Sheet: S8 Table
S8 Table. Power (a - h) and type 1 error rate (i - l) for tests involving male sibling pairs on the X chromosome. Results of simulations compared to asymptotic calculations (α = 0.05).
(a) Parental genotypes available (N = 2000 sibling pairs; b2 = 0.1%; d2 = 0.1%)							(e) Parental genotypes available (N = 2000 sibling pairs; b2 = 0.1%; d2 = 0.05%)							(i) Parental genotypes available (N = 2000 sibling pairs; b2 = 0%; d2 = 0%)
	Asymptotic	Simulation	Asymptotic	Simulation				Asymptotic	Simulation	Asymptotic	Simulation				Asymptotic	Simulation	Asymptotic	Simulation
Statistical Test	ψ2 = 0	ψ2 = 0	ψ2 = 0.2	ψ2 = 0.2			Statistical Test	ψ2 = 0	ψ2 = 0	ψ2 = 0.2	ψ2 = 0.2			Statistical Test	ψ2 = 0	ψ2 = 0	ψ2 = 0.2	ψ2 = 0.2
Maternal Genetic Effect (1 df)	0.294	0.325	0.276	0.282			Maternal Genetic Effect (1 df)	0.17	0.174	0.161	0.152			Maternal Genetic Effect (1 df)	0.05	0.051	0.05	0.051
Offspring Genetic Effect (1 df)	0.294	0.284	0.304	0.308			Offspring Genetic Effect (1 df)	0.294	0.298	0.304	0.318			Offspring Genetic Effect (1 df)	0.05	0.046	0.05	0.049
Omnibus test (2 df)	0.922	0.941	0.878	0.871			Omnibus test (2 df)	0.816	0.804	0.758	0.766			Omnibus test (2 df)	0.05	0.061	0.05	0.05
Offspring Only (1df)	0.927	0.938	0.884	0.876			Offspring Only (1df)	0.851	0.835	0.799	0.811			Offspring Only (1df)	0.05	0.064	0.05	0.047
(b) Parental genotypes imputed (N = 2000 sibling pairs; b2 = 0.1%; d2 = 0.1%; p = 0.1)							(f) Parental genotypes imputed (N = 2000 sibling pairs; b2 = 0.1%; d2 = 0.05%; p = 0.1)							(j) Parental genotypes imputed (N = 2000 sibling pairs; b2 = 0%; d2 = 0%; p = 0.1)
	Asymptotic	Simulation	Asymptotic	Simulation				Asymptotic	Simulation	Asymptotic	Simulation				Asymptotic	Simulation	Asymptotic	Simulation
Statistical Test	ψ2 = 0	ψ2 = 0	ψ2 = 0.2	ψ2 = 0.2			Statistical Test	ψ2 = 0	ψ2 = 0	ψ2 = 0.2	ψ2 = 0.2			Statistical Test	ψ2 = 0	ψ2 = 0	ψ2 = 0.2	ψ2 = 0.2
Maternal Genetic Effect (1 df)	0.154	0.154	0.159	0.157			Maternal Genetic Effect (1 df)	0.101	0.093	0.104	0.107			Maternal Genetic Effect (1 df)	0.05	0.036	0.05	0.049
Offspring Genetic Effect (1 df)	0.197	0.2	0.224	0.232			Offspring Genetic Effect (1 df)	0.197	0.217	0.223	0.214			Offspring Genetic Effect (1 df)	0.05	0.043	0.05	0.053
Omnibus test (2 df)	0.897	0.91	0.848	0.848			Omnibus test (2 df)	0.791	0.778	0.734	0.745			Omnibus test (2 df)	0.05	0.051	0.05	0.043
(c) Parental genotypes imputed (N = 2000 sibling pairs; b2 = 0.1%; d2 = 0.1%; p = 0.5)							(g) Parental genotypes imputed (N = 2000 sibling pairs; b2 = 0.1%; d2 = 0.05%; p = 0.5)							(k) Parental genotypes imputed (N = 2000 sibling pairs; b2 = 0%; d2 = 0%; p = 0.5)
	Asymptotic	Simulation	Asymptotic	Simulation				Asymptotic	Simulation	Asymptotic	Simulation				Asymptotic	Simulation	Asymptotic	Simulation
Statistical Test	ψ2 = 0	ψ2 = 0	ψ2 = 0.2	ψ2 = 0.2			Statistical Test	ψ2 = 0	ψ2 = 0	ψ2 = 0.2	ψ2 = 0.2			Statistical Test	ψ2 = 0	ψ2 = 0	ψ2 = 0.2	ψ2 = 0.2
Maternal Genetic Effect (1 df)	0.129	0.124	0.139	0.142			Maternal Genetic Effect (1 df)	0.089	0.093	0.094	0.102			Maternal Genetic Effect (1 df)	0.05	0.037	0.05	0.05
Offspring Genetic Effect (1 df)	0.17	0.165	0.202	0.206			Offspring Genetic Effect (1 df)	0.17	0.18	0.201	0.192			Offspring Genetic Effect (1 df)	0.05	0.047	0.05	0.054
Omnibus test (2 df)	0.892	0.879	0.842	0.848			Omnibus test (2 df)	0.787	0.81	0.729	0.723			Omnibus test (2 df)	0.05	0.049	0.05	0.054
(d) Parental genotypes imputed (N = 2000 sibling pairs; b2 = 0.1%; d2 = 0.1%; p = 0.9)							(h) Parental genotypes imputed (N = 2000 sibling pairs; b2 = 0.1%; d2 = 0.05%; p = 0.9)							(l) Parental genotypes imputed (N = 2000 sibling pairs; b2 = 0%; d2 = 0%; p = 0.9)
	Asymptotic	Simulation	Asymptotic	Simulation				Asymptotic	Simulation	Asymptotic	Simulation				Asymptotic	Simulation	Asymptotic	Simulation
Statistical Test	ψ2 = 0	ψ2 = 0	ψ2 = 0.2	ψ2 = 0.2			Statistical Test	ψ2 = 0	ψ2 = 0	ψ2 = 0.2	ψ2 = 0.2			Statistical Test	ψ2 = 0	ψ2 = 0	ψ2 = 0.2	ψ2 = 0.2
Maternal Genetic Effect (1 df)	0.154	0.14	0.159	0.138			Maternal Genetic Effect (1 df)	0.101	0.088	0.104	0.084			Maternal Genetic Effect (1 df)	0.05	0.051	0.05	0.055
Offspring Genetic Effect (1 df)	0.197	0.187	0.224	0.237			Offspring Genetic Effect (1 df)	0.197	0.19	0.223	0.228			Offspring Genetic Effect (1 df)	0.05	0.047	0.05	0.046
Omnibus test (2 df)	0.897	0.891	0.848	0.83			Omnibus test (2 df)	0.791	0.803	0.734	0.734			Omnibus test (2 df)	0.05	0.046	0.05	0.066
