# Supplementary material for: Estimating indirect parental genetic effects on offspring phenotypes using virtual parental genotypes derived from sibling and half sibling pairs
Source: PLoS Genet. 2020 Oct 26;16(10):e1009154. doi: 10.1371/journal.pgen.1009154 (PMC7646364; doi:10.1371/journal.pgen.1009154)
Supplement: S14 Table — (XLSX) [file pgen.1009154.s016.xlsx]

## Sheet: S14 Table
S14 Table. Power to detect association at X chromosome loci using genotyped female-female sibling pairs with and without parental genotypes (α = 0.05).																																													Supplementary Table 13. Power to detect association at X chromosome loci using genotyped female sibling pairs with and without parental genotypes (α = 0.05).
Parental genotypes available (N = 2000 pairs; b2 = 0.1%; d2 = 0.1%; f2 = 0.1%)									Parental genotypes available (N = 2000 pairs; b2 = 0.1%; d2 = 0.1%; f2 = 0.1%; Maternal effect discordant with offspring and paternal effect)									Parental genotypes available (N = 2000 pairs; b2 = 0.1%; d2 = 0.1%; f2 = 0.1%; Offspring effect discordant with maternal and paternal effect)									Parental genotypes available (N = 2000 pairs; b2 = 0.1%; d2 = 0.1%)									Parental genotypes available (N = 2000 pairs; b2 = 0.1%; d2 = 0.1%; Effects Discordant)									Parental genotypes available (N = 2000 pairs; b2 = 0.1%; f2 = 0.1%)
Statistical Test	ψ2 = 0	ψ2 = 0.1	ψ2 = 0.2	ψ2 = 0.3	ψ2 = 0.4	ψ2 = 0.5	ψ2 = 0.6		Statistical Test	ψ2 = 0	ψ2 = 0.1	ψ2 = 0.2	ψ2 = 0.3	ψ2 = 0.4	ψ2 = 0.5	ψ2 = 0.6		Statistical Test	ψ2 = 0	ψ2 = 0.1	ψ2 = 0.2	ψ2 = 0.3	ψ2 = 0.4	ψ2 = 0.5	ψ2 = 0.6		Statistical Test	ψ2 = 0	ψ2 = 0.1	ψ2 = 0.2	ψ2 = 0.3	ψ2 = 0.4	ψ2 = 0.5	ψ2 = 0.6		Statistical Test	ψ2 = 0	ψ2 = 0.1	ψ2 = 0.2	ψ2 = 0.3	ψ2 = 0.4	ψ2 = 0.5	ψ2 = 0.6		Statistical Test	ψ2 = 0	ψ2 = 0.1	ψ2 = 0.2	ψ2 = 0.3
Maternal Genetic Effect (1 df)	0.294	0.284	0.276	0.271	0.268	0.267	0.268		Maternal Genetic Effect (1 df)	0.294	0.283	0.276	0.271	0.268	0.267	0.268		Maternal Genetic Effect (1 df)	0.293	0.283	0.275	0.27	0.267	0.266	0.267		Maternal Genetic Effect (1 df)	0.293641	0.283145	0.275567	0.270446	0.267489	0.266539	0.267545		Maternal Genetic Effect (1 df)	0.293156	0.282696	0.275139	0.270026	0.267067	0.266103	0.267083		Maternal Genetic Effect (1 df)	0.05	0.05	0.05	0.05
Paternal Genetic Effect (1 df)	0.212	0.208	0.206	0.206	0.208	0.212	0.219		Paternal Genetic Effect (1 df)	0.212	0.207	0.205	0.205	0.208	0.212	0.219		Paternal Genetic Effect (1 df)	0.211	0.207	0.205	0.205	0.207	0.211	0.218		Paternal Genetic Effect (1 df)	0.05	0.05	0.05	0.05	0.05	0.05	0.05		Paternal Genetic Effect (1 df)	0.05	0.05	0.05	0.05	0.05	0.05	0.05		Paternal Genetic Effect (1 df)	0.211788	0.207486	0.205426	0.205444
Offspring Genetic Effect (1 df)	0.171	0.172	0.176	0.183	0.195	0.213	0.242		Offspring Genetic Effect (1 df)	0.17	0.172	0.176	0.183	0.194	0.212	0.241		Offspring Genetic Effect (1 df)	0.17	0.171	0.175	0.182	0.194	0.211	0.24		Offspring Genetic Effect (1 df)	0.170431	0.171687	0.175618	0.182752	0.194185	0.212048	0.24071		Offspring Genetic Effect (1 df)	0.170183	0.171432	0.175338	0.182425	0.193776	0.211495	0.239885		Offspring Genetic Effect (1 df)	0.170482	0.17174	0.175676	0.18282
Omnibus Test (3 df)	0.984	0.974	0.962	0.948	0.933	0.919	0.907		Omnibus Test (3 df)	0.888	0.857	0.826	0.797	0.772	0.751	0.736		Omnibus Test (3 df)	0.22	0.211	0.205	0.203	0.204	0.211	0.225		Omnibus Test (3 df)	0.840324	0.804394	0.770691	0.740244	0.714043	0.69339	0.680578		Omnibus Test (3 df)	0.358607	0.33664	0.320219	0.308881	0.302747	0.30279	0.311627		Omnibus Test (3 df)	0.888031	0.856775	0.826167	0.797449
Offspring Only (1 df)	0.993	0.988	0.98	0.971	0.96	0.948	0.936		Offspring Only (1 df)	0.675	0.641	0.613	0.591	0.575	0.567	0.57		Offspring Only (1 df)	0.07	0.063	0.058	0.053	0.05	0.05	0.056		Offspring Only (1 df)	0.851	0.819	0.79	0.764	0.742	0.725	0.715		Offspring Only (1 df)	0.17	0.168	0.169	0.173	0.181	0.195	0.219		Offspring Only (1 df)	0.927	0.904	0.88	0.856
Parental genotypes imputed (N = 2000 pairs; b2 = 0.1%; d2 = 0.1%; f2 = 0.1%; p = 0.1)									Parental genotypes imputed (N = 2000 pairs; b2 = 0.1%; d2 = 0.1%; f2 = 0.1%; p = 0.1; Maternal effect discordant with offspring and paternal effect)									Parental genotypes imputed (N = 2000 pairs; b2 = 0.1%; d2 = 0.1%; f2 = 0.1%; p = 0.1; Offspring effect discordant with maternal and paternal effect)									Parental genotypes imputed (N = 2000 pairs; b2 = 0.1%; d2 = 0.1%; p = 0.1)									Parental genotypes imputed (N = 2000 pairs; b2 = 0.1%; d2 = 0.1%; p = 0.1; Effects Discordant)									Parental genotypes imputed (N = 2000 pairs; b2 = 0.1%; f2 = 0.1%; p = 0.1)
Statistical Test	ψ2 = 0	ψ2 = 0.1	ψ2 = 0.2	ψ2 = 0.3	ψ2 = 0.4	ψ2 = 0.5	ψ2 = 0.6		Statistical Test	ψ2 = 0	ψ2 = 0.1	ψ2 = 0.2	ψ2 = 0.3	ψ2 = 0.4	ψ2 = 0.5	ψ2 = 0.6		Statistical Test	ψ2 = 0	ψ2 = 0.1	ψ2 = 0.2	ψ2 = 0.3	ψ2 = 0.4	ψ2 = 0.5	ψ2 = 0.6		Statistical Test	ψ2 = 0	ψ2 = 0.1	ψ2 = 0.2	ψ2 = 0.3	ψ2 = 0.4	ψ2 = 0.5	ψ2 = 0.6		Statistical Test	ψ2 = 0	ψ2 = 0.1	ψ2 = 0.2	ψ2 = 0.3	ψ2 = 0.4	ψ2 = 0.5	ψ2 = 0.6		Statistical Test	ψ2 = 0	ψ2 = 0.1	ψ2 = 0.2	ψ2 = 0.3
Maternal Genetic Effect (1 df)	0.15	0.149	0.148	0.146	0.145	0.144	0.144		Maternal Genetic Effect (1 df)	0.15	0.148	0.147	0.146	0.145	0.144	0.143		Maternal Genetic Effect (1 df)	0.149	0.148	0.147	0.146	0.145	0.144	0.143		Maternal Genetic Effect (1 df)	0.149696	0.148435	0.147276	0.146198	0.145186	0.144228	0.143315		Maternal Genetic Effect (1 df)	0.149491	0.148235	0.147081	0.146007	0.144998	0.144043	0.143134		Maternal Genetic Effect (1 df)	0.05	0.05	0.05	0.05
Paternal Genetic Effect (1 df)	0.111	0.114	0.117	0.121	0.125	0.13	0.136		Paternal Genetic Effect (1 df)	0.111	0.114	0.117	0.121	0.125	0.13	0.136		Paternal Genetic Effect (1 df)	0.111	0.114	0.117	0.121	0.125	0.13	0.135		Paternal Genetic Effect (1 df)	0.05	0.05	0.05	0.05	0.05	0.05	0.05		Paternal Genetic Effect (1 df)	0.05	0.05	0.05	0.05	0.05	0.05	0.05		Paternal Genetic Effect (1 df)	0.110843	0.113778	0.1171	0.120864
Offspring Genetic Effect (1 df)	0.111	0.118	0.126	0.137	0.152	0.173	0.204		Offspring Genetic Effect (1 df)	0.111	0.117	0.126	0.137	0.151	0.172	0.203		Offspring Genetic Effect (1 df)	0.111	0.117	0.126	0.136	0.151	0.171	0.202		Offspring Genetic Effect (1 df)	0.110825	0.117433	0.125796	0.136661	0.151287	0.171943	0.203159		Offspring Genetic Effect (1 df)	0.1107	0.11728	0.125602	0.136408	0.150942	0.171444	0.202378		Offspring Genetic Effect (1 df)	0.110851	0.117465	0.125836	0.136714
Omnibus Test (3 df)	0.978	0.966	0.951	0.935	0.919	0.903	0.89		Omnibus Test (3 df)	0.655	0.615	0.582	0.554	0.533	0.519	0.515		Omnibus Test (3 df)	0.127	0.127	0.128	0.132	0.138	0.148	0.165		Omnibus Test (3 df)	0.760155	0.720485	0.685142	0.65468	0.629736	0.611414	0.602023		Omnibus Test (3 df)	0.190826	0.184508	0.181115	0.180679	0.183698	0.191423	0.206704		Omnibus Test (3 df)	0.848778	0.813531	0.780247	0.750002
Parental genotypes imputed (N = 2000 pairs; b2 = 0.1%; d2 = 0.1%; f2 = 0.1%; p = 0.5)									Parental genotypes imputed (N = 2000 pairs; b2 = 0.1%; d2 = 0.1%; f2 = 0.1%; p = 0.5; Maternal effect discordant with offspring and paternal effect)									Parental genotypes imputed (N = 2000 pairs; b2 = 0.1%; d2 = 0.1%; f2 = 0.1%; p = 0.5; Offspring effect discordant with maternal and paternal effect)									Parental genotypes imputed (N = 2000 pairs; b2 = 0.1%; d2 = 0.1%; p = 0.5)									Parental genotypes imputed (N = 2000 pairs; b2 = 0.1%; d2 = 0.1%; p = 0.5; Effects Discordant)									Parental genotypes imputed (N = 2000 pairs; b2 = 0.1%; f2 = 0.1%; p = 0.5)
Statistical Test	ψ2 = 0	ψ2 = 0.1	ψ2 = 0.2	ψ2 = 0.3	ψ2 = 0.4	ψ2 = 0.5	ψ2 = 0.6		Statistical Test	ψ2 = 0	ψ2 = 0.1	ψ2 = 0.2	ψ2 = 0.3	ψ2 = 0.4	ψ2 = 0.5	ψ2 = 0.6		Statistical Test	ψ2 = 0	ψ2 = 0.1	ψ2 = 0.2	ψ2 = 0.3	ψ2 = 0.4	ψ2 = 0.5	ψ2 = 0.6		Statistical Test	ψ2 = 0	ψ2 = 0.1	ψ2 = 0.2	ψ2 = 0.3	ψ2 = 0.4	ψ2 = 0.5	ψ2 = 0.6		Statistical Test	ψ2 = 0	ψ2 = 0.1	ψ2 = 0.2	ψ2 = 0.3	ψ2 = 0.4	ψ2 = 0.5	ψ2 = 0.6		Statistical Test	ψ2 = 0	ψ2 = 0.1	ψ2 = 0.2	ψ2 = 0.3
Maternal Genetic Effect (1 df)	0.089	0.088	0.087	0.086	0.086	0.085	0.084		Maternal Genetic Effect (1 df)	0.089	0.088	0.087	0.086	0.085	0.085	0.084		Maternal Genetic Effect (1 df)	0.089	0.88	0.087	0.086	0.085	0.085	0.083		Maternal Genetic Effect (1 df)	0.0890614	0.0880899	0.0871654	0.0862845	0.0854444	0.0846422	0.0838755		Maternal Genetic Effect (1 df)	0.0889819	0.0880142	0.0870933	0.0862159	0.0853789	0.0845796	0.0838156		Maternal Genetic Effect (1 df)	0.05	0.05	0.05	0.05
Paternal Genetic Effect (1 df)	0.109	0.109	0.109	0.109	0.109	0.109	0.109		Paternal Genetic Effect (1 df)	0.109	0.109	0.109	0.109	0.109	0.109	0.109		Paternal Genetic Effect (1 df)	0.109	0.109	0.109	0.109	0.109	0.109	0.109		Paternal Genetic Effect (1 df)	0.05	0.05	0.05	0.05	0.05	0.05	0.05		Paternal Genetic Effect (1 df)	0.05	0.05	0.05	0.05	0.05	0.05	0.05		Paternal Genetic Effect (1 df)	0.109135	0.109135	0.109135	0.109134
Offspring Genetic Effect (1 df)	0.109	0.116	0.124	0.136	0.15	0.171	0.203		Offspring Genetic Effect (1 df)	0.109	0.226	0.124	0.135	0.15	0.171	0.202		Offspring Genetic Effect (1 df)	0.109	0.116	0.124	0.135	0.15	0.17	0.201		Offspring Genetic Effect (1 df)	0.109129	0.115885	0.124371	0.135341	0.150055	0.170788	0.202074		Offspring Genetic Effect (1 df)	0.109007	0.115735	0.12418	0.13509	0.149712	0.170291	0.201294		Offspring Genetic Effect (1 df)	0.109154	0.115917	0.124411	0.135393
Omnibus Test (3 df)	0.977	0.964	0.95	0.934	0.917	0.901	0.888		Omnibus Test (3 df)	0.566	0.529	0.45	0.476	0.459	0.449	0.449		Omnibus Test (3 df)	0.116	0.117	0.119	0.123	0.13	0.14	0.158		Omnibus Test (3 df)	0.72849	0.688366	0.653201	0.62336	0.599358	0.582233	0.574299		Omnibus Test (3 df)	0.140235	0.138729	0.139219	0.141942	0.147528	0.157316	0.174203		Omnibus Test (3 df)	0.845343	0.809818	0.776365	0.74604
Parental genotypes imputed (N = 2000 pairs; b2 = 0.1%; d2 = 0.1%; f2 = 0.1%; p = 0.9)									Parental genotypes imputed (N = 2000 pairs; b2 = 0.1%; d2 = 0.1%; f2 = 0.1%; p = 0.9; Maternal effect discordant with offspring and paternal effect)									Parental genotypes imputed (N = 2000 pairs; b2 = 0.1%; d2 = 0.1%; f2 = 0.1%; p = 0.9; Offspring effect discordant with maternal and paternal effect)									Parental genotypes imputed (N = 2000 pairs; b2 = 0.1%; d2 = 0.1%; p = 0.9)									Parental genotypes imputed (N = 2000 pairs; b2 = 0.1%; d2 = 0.1%; p = 0.9; Effects Discordant)									Parental genotypes imputed (N = 2000 pairs; b2 = 0.1%; f2 = 0.1%; p = 0.9)
Statistical Test	ψ2 = 0	ψ2 = 0.1	ψ2 = 0.2	ψ2 = 0.3	ψ2 = 0.4	ψ2 = 0.5	ψ2 = 0.6		Statistical Test	ψ2 = 0	ψ2 = 0.1	ψ2 = 0.2	ψ2 = 0.3	ψ2 = 0.4	ψ2 = 0.5	ψ2 = 0.6		Statistical Test	ψ2 = 0	ψ2 = 0.1	ψ2 = 0.2	ψ2 = 0.3	ψ2 = 0.4	ψ2 = 0.5	ψ2 = 0.6		Statistical Test	ψ2 = 0	ψ2 = 0.1	ψ2 = 0.2	ψ2 = 0.3	ψ2 = 0.4	ψ2 = 0.5	ψ2 = 0.6		Statistical Test	ψ2 = 0	ψ2 = 0.1	ψ2 = 0.2	ψ2 = 0.3	ψ2 = 0.4	ψ2 = 0.5	ψ2 = 0.6		Statistical Test	ψ2 = 0	ψ2 = 0.1	ψ2 = 0.2	ψ2 = 0.3
Maternal Genetic Effect (1 df)	0.15	0.149	0.148	0.146	0.145	0.144	0.144		Maternal Genetic Effect (1 df)	0.15	0.148	0.147	0.146	0.145	0.144	0.143		Maternal Genetic Effect (1 df)	0.149	0.148	0.147	0.146	0.145	0.144	0.143		Maternal Genetic Effect (1 df)	0.149696	0.148435	0.147276	0.146198	0.145186	0.144228	0.143315		Maternal Genetic Effect (1 df)	0.149491	0.148235	0.147081	0.146007	0.144998	0.144043	0.143134		Maternal Genetic Effect (1 df)	0.05	0.05	0.05	0.05
Paternal Genetic Effect (1 df)	0.111	0.114	0.117	0.121	0.125	0.13	0.136		Paternal Genetic Effect (1 df)	0.111	0.114	0.117	0.121	0.125	0.13	0.136		Paternal Genetic Effect (1 df)	0.111	0.114	0.117	0.121	0.125	0.13	0.135		Paternal Genetic Effect (1 df)	0.05	0.05	0.05	0.05	0.05	0.05	0.05		Paternal Genetic Effect (1 df)	0.05	0.05	0.05	0.05	0.05	0.05	0.05		Paternal Genetic Effect (1 df)	0.110843	0.113778	0.1171	0.120864
Offspring Genetic Effect (1 df)	0.111	0.118	0.126	0.137	0.152	0.173	0.204		Offspring Genetic Effect (1 df)	0.111	0.117	0.126	0.137	0.151	0.172	0.203		Offspring Genetic Effect (1 df)	0.111	0.117	0.126	0.136	0.151	0.171	0.202		Offspring Genetic Effect (1 df)	0.110825	0.117433	0.125796	0.136661	0.151287	0.171943	0.203159		Offspring Genetic Effect (1 df)	0.1107	0.11728	0.125602	0.136408	0.150942	0.171444	0.202378		Offspring Genetic Effect (1 df)	0.110851	0.117465	0.125836	0.136714
Omnibus Test (3 df)	0.978	0.966	0.951	0.935	0.919	0.903	0.89		Omnibus Test (3 df)	0.655	0.615	0.582	0.554	0.533	0.519	0.515		Omnibus Test (3 df)	0.127	0.127	0.128	0.132	0.138	0.148	0.165		Omnibus Test (3 df)	0.760155	0.720485	0.685142	0.65468	0.629736	0.611414	0.602023		Omnibus Test (3 df)	0.190826	0.184508	0.181115	0.180679	0.183698	0.191423	0.206704		Omnibus Test (3 df)	0.848778	0.813531	0.780247	0.750002
Parental genotypes imputed (N = 20000 pairs; b2 = 0.1%; d2 = 0.1%; f2 = 0.1%; p = 0.1)									Parental genotypes imputed (N = 20000 pairs; b2 = 0.1%; d2 = 0.1%; f2 = 0.1%; p = 0.1; Maternal effect discordant with offspring and paternal effect)									Parental genotypes imputed (N = 20000 pairs; b2 = 0.1%; d2 = 0.1%; f2 = 0.1%; p = 0.1; Offspring effect discordant with maternal and paternal effect)									Parental genotypes imputed (N = 20000 pairs; b2 = 0.1%; d2 = 0.1%; p = 0.1)									Parental genotypes imputed (N = 20000 pairs; b2 = 0.1%; d2 = 0.1%; p = 0.1; Effects Discordant)									Parental genotypes imputed (N = 20000 pairs; b2 = 0.1%; f2 = 0.1%; p = 0.1)
Statistical Test	ψ2 = 0	ψ2 = 0.1	ψ2 = 0.2	ψ2 = 0.3	ψ2 = 0.4	ψ2 = 0.5	ψ2 = 0.6		Statistical Test	ψ2 = 0	ψ2 = 0.1	ψ2 = 0.2	ψ2 = 0.3	ψ2 = 0.4	ψ2 = 0.5	ψ2 = 0.6		Statistical Test	ψ2 = 0	ψ2 = 0.1	ψ2 = 0.2	ψ2 = 0.3	ψ2 = 0.4	ψ2 = 0.5	ψ2 = 0.6		Statistical Test	ψ2 = 0	ψ2 = 0.1	ψ2 = 0.2	ψ2 = 0.3	ψ2 = 0.4	ψ2 = 0.5	ψ2 = 0.6		Statistical Test	ψ2 = 0	ψ2 = 0.1	ψ2 = 0.2	ψ2 = 0.3	ψ2 = 0.4	ψ2 = 0.5	ψ2 = 0.6		Statistical Test	ψ2 = 0	ψ2 = 0.1	ψ2 = 0.2	ψ2 = 0.3
Maternal Genetic Effect (1 df)	0.824	0.82	0.815	0.811	0.807	0.803	0.8		Maternal Genetic Effect (1 df)	0.823	0.818	0.814	0.81	0.806	0.802	0.799		Maternal Genetic Effect (1 df)	0.823	0.818	0.814	0.809	0.805	0.802	0.798		Maternal Genetic Effect (1 df)	0.823472	0.818809	0.814431	0.810274	0.806297	0.802465	0.798755		Maternal Genetic Effect (1 df)	0.822721	0.81806	0.813683	0.809527	0.805551	0.80172	0.798011		Maternal Genetic Effect (1 df)	0.05	0.05	0.05	0.05
Paternal Genetic Effect (1 df)	0.623	0.643	0.664	0.688	0.712	0.739	0.766		Paternal Genetic Effect (1 df)	0.622	0.642	0.663	0.686	0.711	0.737	0.765		Paternal Genetic Effect (1 df)	0.621	0.641	0.662	0.685	0.71	0.736	0.763		Paternal Genetic Effect (1 df)	0.05	0.05	0.05	0.05	0.05	0.05	0.05		Paternal Genetic Effect (1 df)	0.05	0.05	0.05	0.05	0.05	0.05	0.05		Paternal Genetic Effect (1 df)	0.622043	0.641955	0.663484	0.686605
Offspring Genetic Effect (1 df)	0.623	0.667	0.716	0.771	0.831	0.891	0.946		Offspring Genetic Effect (1 df)	0.622	0.666	0.715	0.77	0.829	0.89	0.945		Offspring Genetic Effect (1 df)	0.621	0.664	0.714	0.768	0.828	0.888	0.944		Offspring Genetic Effect (1 df)	0.621916	0.665584	0.71492	0.769821	0.829201	0.889933	0.945277		Offspring Genetic Effect (1 df)	0.621052	0.66462	0.713851	0.768654	0.827973	0.888734	0.944286		Offspring Genetic Effect (1 df)	0.622099	0.665786	0.715143	0.770064
Omnibus Test (3 df)	1	1	1	1	1	1	1		Omnibus Test (3 df)	1	1	1	1	1	1	1		Omnibus Test (3 df)	0.826	0.824	0.831	0.847	0.872	0.905	0.043		Omnibus Test (3 df)	1	1	1	1	1	1	1		Omnibus Test (3 df)	0.97394	0.968252	0.964724	0.964245	0.967442	0.974424	0.98424		Omnibus Test (3 df)	1	1	1	1
Parental genotypes imputed (N = 20000 pairs; b2 = 0.1%; d2 = 0.1%; f2 = 0.1%; p = 0.5)									Parental genotypes imputed (N = 20000 pairs; b2 = 0.1%; d2 = 0.1%; f2 = 0.1%; p = 0.5; Maternal effect discordant with offspring and paternal effect)									Parental genotypes imputed (N = 20000 pairs; b2 = 0.1%; d2 = 0.1%; f2 = 0.1%; p = 0.5; Offspring effect discordant with maternal and paternal effect)									Parental genotypes imputed (N = 20000 pairs; b2 = 0.1%; d2 = 0.1%; p = 0.5)									Parental genotypes imputed (N = 20000 pairs; b2 = 0.1%; d2 = 0.1%; p = 0.5; Effects Discordant)									Parental genotypes imputed (N = 20000 pairs; b2 = 0.1%; f2 = 0.1%; p = 0.5)
Statistical Test	ψ2 = 0	ψ2 = 0.1	ψ2 = 0.2	ψ2 = 0.3	ψ2 = 0.4	ψ2 = 0.5	ψ2 = 0.6		Statistical Test	ψ2 = 0	ψ2 = 0.1	ψ2 = 0.2	ψ2 = 0.3	ψ2 = 0.4	ψ2 = 0.5	ψ2 = 0.6		Statistical Test	ψ2 = 0	ψ2 = 0.1	ψ2 = 0.2	ψ2 = 0.3	ψ2 = 0.4	ψ2 = 0.5	ψ2 = 0.6		Statistical Test	ψ2 = 0	ψ2 = 0.1	ψ2 = 0.2	ψ2 = 0.3	ψ2 = 0.4	ψ2 = 0.5	ψ2 = 0.6		Statistical Test	ψ2 = 0	ψ2 = 0.1	ψ2 = 0.2	ψ2 = 0.3	ψ2 = 0.4	ψ2 = 0.5	ψ2 = 0.6		Statistical Test	ψ2 = 0	ψ2 = 0.1	ψ2 = 0.2	ψ2 = 0.3
Maternal Genetic Effect (1 df)	0.448	0.44	0.431	0.423	0.415	0.407	0.4		Maternal Genetic Effect (1 df)	0.447	0.438	0.43	0.422	0.414	0.406	0.399		Maternal Genetic Effect (1 df)	0.447	0.438	0.429	0.421	0.413	0.406	0.399		Maternal Genetic Effect (1 df)	0.447457	0.43859	0.430072	0.421884	0.41401	0.406434	0.399141		Maternal Genetic Effect (1 df)	0.446734	0.437896	0.429405	0.421243	0.413394	0.405841	0.398569		Maternal Genetic Effect (1 df)	0.05	0.05	0.05	0.05
Paternal Genetic Effect (1 df)	0.611	0.611	0.611	0.611	0.611	0.611	0.611		Paternal Genetic Effect (1 df)	0.609	0.609	0.609	0.609	0.609	0.609	0.609		Paternal Genetic Effect (1 df)	0.609	0.609	0.609	0.609	0.609	0.609	0.608		Paternal Genetic Effect (1 df)	0.05	0.05	0.05	0.05	0.05	0.05	0.05		Paternal Genetic Effect (1 df)	0.05	0.05	0.05	0.05	0.05	0.05	0.05		Paternal Genetic Effect (1 df)	0.61006	0.610059	0.610059	0.610057
Offspring Genetic Effect (1 df)	0.611	0.657	0.708	0.765	0.826	0.889	0.945		Offspring Genetic Effect (1 df)	0.61	0.656	0.707	0.764	0.825	0.887	0.944		Offspring Genetic Effect (1 df)	0.609	0.655	0.706	0.762	0.823	0.886	0.943		Offspring Genetic Effect (1 df)	0.610016	0.655736	0.706969	0.763671	0.824779	0.887138	0.943896		Offspring Genetic Effect (1 df)	0.609155	0.654768	0.70589	0.762487	0.823529	0.885915	0.942883		Offspring Genetic Effect (1 df)	0.610194	0.655937	0.707193	0.763916
Omnibus Test (3 df)	1	1	1	1	1	1	1		Omnibus Test (3 df)	1	1	1	1	1	1	1		Omnibus Test (3 df)	0.763	0.768	0.782	0.805	0.838	0.881	0.929		Omnibus Test (3 df)	1	1	1	1	1	1	1		Omnibus Test (3 df)	0.879738	0.874403	0.876161	0.885529	0.90273	0.927195	0.956345		Omnibus Test (3 df)	1	1	1	1
Parental genotypes imputed (N = 20000 pairs; b2 = 0.1%; d2 = 0.1%; f2 = 0.1%; p = 0.9)									Parental genotypes imputed (N = 20000 pairs; b2 = 0.1%; d2 = 0.1%; f2 = 0.1%; p = 0.9; Maternal effect discordant with offspring and paternal effect)									Parental genotypes imputed (N = 20000 pairs; b2 = 0.1%; d2 = 0.1%; f2 = 0.1%; p = 0.9; Offspring effect discordant with maternal and paternal effect)									Parental genotypes imputed (N = 20000 pairs; b2 = 0.1%; d2 = 0.1%; p = 0.9)									Parental genotypes imputed (N = 20000 pairs; b2 = 0.1%; d2 = 0.1%; p = 0.9; Effects Discordant)									Parental genotypes imputed (N = 20000 pairs; b2 = 0.1%; f2 = 0.1%; p = 0.9)
Statistical Test	ψ2 = 0	ψ2 = 0.1	ψ2 = 0.2	ψ2 = 0.3	ψ2 = 0.4	ψ2 = 0.5	ψ2 = 0.6		Statistical Test	ψ2 = 0	ψ2 = 0.1	ψ2 = 0.2	ψ2 = 0.3	ψ2 = 0.4	ψ2 = 0.5	ψ2 = 0.6		Statistical Test	ψ2 = 0	ψ2 = 0.1	ψ2 = 0.2	ψ2 = 0.3	ψ2 = 0.4	ψ2 = 0.5	ψ2 = 0.6		Statistical Test	ψ2 = 0	ψ2 = 0.1	ψ2 = 0.2	ψ2 = 0.3	ψ2 = 0.4	ψ2 = 0.5	ψ2 = 0.6		Statistical Test	ψ2 = 0	ψ2 = 0.1	ψ2 = 0.2	ψ2 = 0.3	ψ2 = 0.4	ψ2 = 0.5	ψ2 = 0.6		Statistical Test	ψ2 = 0	ψ2 = 0.1	ψ2 = 0.2	ψ2 = 0.3
Maternal Genetic Effect (1 df)	0.824	0.82	0.815	0.811	0.807	0.803	0.8		Maternal Genetic Effect (1 df)	0.823	0.819	0.814	0.81	0.806	0.802	0.799		Maternal Genetic Effect (1 df)	0.823	0.818	0.814	0.809	0.805	0.802	0.798		Maternal Genetic Effect (1 df)	0.823472	0.818809	0.814431	0.810274	0.806297	0.802465	0.798755		Maternal Genetic Effect (1 df)	0.822721	0.81806	0.813683	0.809527	0.805551	0.80172	0.798011		Maternal Genetic Effect (1 df)	0.05	0.05	0.05	0.05
Paternal Genetic Effect (1 df)	0.623	0.643	0.664	0.688	0.712	0.739	0.766		Paternal Genetic Effect (1 df)	0.622	0.642	0.663	0.686	0.711	0.737	0.765		Paternal Genetic Effect (1 df)	0.621	0.641	0.662	0.685	0.71	0.736	0.763		Paternal Genetic Effect (1 df)	0.05	0.05	0.05	0.05	0.05	0.05	0.05		Paternal Genetic Effect (1 df)	0.05	0.05	0.05	0.05	0.05	0.05	0.05		Paternal Genetic Effect (1 df)	0.622043	0.641955	0.663484	0.686605
Offspring Genetic Effect (1 df)	0.623	0.667	0.716	0.771	0.831	0.891	0.946		Offspring Genetic Effect (1 df)	0.622	0.666	0.715	0.77	0.829	0.89	0.945		Offspring Genetic Effect (1 df)	0.621	0.664	0.714	0.768	0.828	0.888	0.944		Offspring Genetic Effect (1 df)	0.621916	0.665584	0.71492	0.769821	0.829201	0.889933	0.945277		Offspring Genetic Effect (1 df)	0.621052	0.66462	0.713851	0.768654	0.827973	0.888734	0.944286		Offspring Genetic Effect (1 df)	0.622099	0.665786	0.715143	0.770064
Omnibus Test (3 df)	1	1	1	1	1	1	1		Omnibus Test (3 df)	1	1	1	1	1	1	1		Omnibus Test (3 df)	0.826	0.824	0.831	0.847	0.872	0.905	0.943		Omnibus Test (3 df)	1	1	1	1	1	1	1		Omnibus Test (3 df)	0.97394	0.968252	0.964724	0.964245	0.967442	0.974424	0.98424		Omnibus Test (3 df)	1	1	1	1
[truncated: 51 more columns]
