# Supplementary material for: Estimating indirect parental genetic effects on offspring phenotypes using virtual parental genotypes derived from sibling and half sibling pairs
Source: PLoS Genet. 2020 Oct 26;16(10):e1009154. doi: 10.1371/journal.pgen.1009154 (PMC7646364; doi:10.1371/journal.pgen.1009154)
Supplement: S15 Table — (XLSX) [file pgen.1009154.s017.xlsx]

## Sheet: S15 Table
S15 Table. Power to detect association at X chromosome loci using genotyped opposite sex sibling pairs with and without parental genotypes (α = 0.05).
Parental genotypes available (N = 2000 pairs; b2 = 0.1%; d2 = 0.1%; f2 = 0.1%)									Parental genotypes available (N = 2000 pairs; b2 = 0.1%; d2 = 0.1%; f2 = 0.1%; Maternal effect discordant with offspring and paternal effect)									Parental genotypes available (N = 2000 pairs; b2 = 0.1%; d2 = 0.1%; f2 = 0.1%; Offspring effect discordant with maternal and paternal effect)									Parental genotypes available (N = 2000 pairs; b2 = 0.1%; d2 = 0.1%)									Parental genotypes available (N = 2000 pairs; b2 = 0.1%; d2 = 0.1%; Effects Discordant)									Parental genotypes available (N = 2000 pairs; b2 = 0.1%; f2 = 0.1%)
Statistical Test	ψ2 = 0	ψ2 = 0.1	ψ2 = 0.2	ψ2 = 0.3	ψ2 = 0.4	ψ2 = 0.5	ψ2 = 0.6		Statistical Test	ψ2 = 0	ψ2 = 0.1	ψ2 = 0.2	ψ2 = 0.3	ψ2 = 0.4	ψ2 = 0.5	ψ2 = 0.6		Statistical Test	ψ2 = 0	ψ2 = 0.1	ψ2 = 0.2	ψ2 = 0.3	ψ2 = 0.4	ψ2 = 0.5	ψ2 = 0.6		Statistical Test	ψ2 = 0	ψ2 = 0.1	ψ2 = 0.2	ψ2 = 0.3	ψ2 = 0.4	ψ2 = 0.5	ψ2 = 0.6		Statistical Test	ψ2 = 0	ψ2 = 0.1	ψ2 = 0.2	ψ2 = 0.3	ψ2 = 0.4	ψ2 = 0.5	ψ2 = 0.6		Statistical Test	ψ2 = 0	ψ2 = 0.1	ψ2 = 0.2	ψ2 = 0.3
Maternal Genetic Effect (1 df)	0.338	0.325	0.316	0.308	0.302	0.298	0.295		Maternal Genetic Effect (1 df)	0.337	0.325	0.325	0.308	0.302	0.298	0.295		Maternal Genetic Effect (1 df)	0.337	0.324	0.315	0.307	0.302	0.297	0.295		Maternal Genetic Effect (1 df)	0.337283	0.324911	0.315249	0.307755	0.30204	0.297822	0.294896		Maternal Genetic Effect (1 df)	0.336638	0.324317	0.314692	0.307222	0.301523	0.297314	0.29439		Maternal Genetic Effect (1 df)	0.05	0.05	0.05	0.05
Paternal Genetic Effect (1 df)	0.462	0.434	0.409	0.388	0.369	0.353	0.338		Paternal Genetic Effect (1 df)	0.462	0.433	0.408	0.387	0.369	0.352	0.338		Paternal Genetic Effect (1 df)	0.461	0.433	0.408	0.387	0.368	0.352	0.338		Paternal Genetic Effect (1 df)	0.05	0.05	0.05	0.05	0.05	0.05	0.05		Paternal Genetic Effect (1 df)	0.05	0.05	0.05	0.05	0.05	0.05	0.05		Paternal Genetic Effect (1 df)	0.461614	0.433018	0.408492	0.387257
Offspring Genetic Effect (1 df)	0.248	0.255	0.266	0.283	0.308	0.345	0.401		Offspring Genetic Effect (1 df)	0.248	0.254	0.266	0.283	0.307	0.344	0.399		Offspring Genetic Effect (1 df)	0.247	0.254	0.265	0.282	0.307	0.343	0.398		Offspring Genetic Effect (1 df)	0.247825	0.25453	0.265822	0.282844	0.307704	0.344228	0.399669		Offspring Genetic Effect (1 df)	0.247312	0.253985	0.265212	0.282125	0.306809	0.34304	0.397973		Offspring Genetic Effect (1 df)	0.247638	0.254334	0.265607	0.282598
Omnibus Test (3 df)	0.951	0.932	0.913	0.895	0.878	0.866	0.862		Omnibus Test (3 df)	0.698	0.664	0.627	0.616	0.604	0.602	0.614		Omnibus Test (3 df)	0.421	0.402	0.39	0.385	0.388	0.401	0.429		Omnibus Test (3 df)	0.813492	0.780245	0.751298	0.727729	0.710835	0.702655	0.70695		Omnibus Test (3 df)	0.254434	0.250385	0.250871	0.256377	0.268225	0.289201	0.325146		Omnibus Test (3 df)	0.711475	0.677169	0.649301	0.628402
Offspring Only (1 df)	0.942	0.921	0.898	0.876	0.857	0.843	0.838		Offspring Only (1 df)	0.192	0.201	0.213	0.231	0.257	0.295	0.352		Offspring Only (1 df)	0.051	0.05	0.054	0.063	0.078	0.106	0.154		Offspring Only (1 df)	0.841	0.81	0.783	0.761	0.746	0.74	0.747		Offspring Only (1 df)	0.08	0.09	0.103	0.121	0.146	0.183	0.24		Offspring Only (1 df)	0.637	0.611	0.593	0.583
Parental genotypes imputed (N = 2000 pairs; b2 = 0.1%; d2 = 0.1%; f2 = 0.1%; p = 0.1)									Parental genotypes imputed (N = 2000 pairs; b2 = 0.1%; d2 = 0.1%; f2 = 0.1%; p = 0.1; Maternal effect discordant with offspring and paternal effect)									Parental genotypes imputed (N = 2000 pairs; b2 = 0.1%; d2 = 0.1%; f2 = 0.1%; p = 0.1; Offspring effect discordant with maternal and paternal effect)									Parental genotypes imputed (N = 2000 pairs; b2 = 0.1%; d2 = 0.1%; p = 0.1)									Parental genotypes imputed (N = 2000 pairs; b2 = 0.1%; d2 = 0.1%; p = 0.1; Effects Discordant)									Parental genotypes imputed (N = 2000 pairs; b2 = 0.1%; f2 = 0.1%; p = 0.1)
Statistical Test	ψ2 = 0	ψ2 = 0.1	ψ2 = 0.2	ψ2 = 0.3	ψ2 = 0.4	ψ2 = 0.5	ψ2 = 0.6		Statistical Test	ψ2 = 0	ψ2 = 0.1	ψ2 = 0.2	ψ2 = 0.3	ψ2 = 0.4	ψ2 = 0.5	ψ2 = 0.6		Statistical Test	ψ2 = 0	ψ2 = 0.1	ψ2 = 0.2	ψ2 = 0.3	ψ2 = 0.4	ψ2 = 0.5	ψ2 = 0.6		Statistical Test	ψ2 = 0	ψ2 = 0.1	ψ2 = 0.2	ψ2 = 0.3	ψ2 = 0.4	ψ2 = 0.5	ψ2 = 0.6		Statistical Test	ψ2 = 0	ψ2 = 0.1	ψ2 = 0.2	ψ2 = 0.3	ψ2 = 0.4	ψ2 = 0.5	ψ2 = 0.6		Statistical Test	ψ2 = 0	ψ2 = 0.1	ψ2 = 0.2	ψ2 = 0.3
Maternal Genetic Effect (1 df)	0.147	0.149	0.151	0.153	0.155	0.158	0.161		Maternal Genetic Effect (1 df)	0.147	0.149	0.151	0.153	0.155	0.158	0.16		Maternal Genetic Effect (1 df)	0.147	0.149	0.151	0.153	0.155	0.158	0.16		Maternal Genetic Effect (1 df)	0.147184	0.148927	0.150873	0.153009	0.155333	0.157844	0.16055		Maternal Genetic Effect (1 df)	0.146931	0.148672	0.150614	0.152745	0.155061	0.157564	0.160259		Maternal Genetic Effect (1 df)	0.05	0.05	0.05	0.05
Paternal Genetic Effect (1 df)	0.323	0.299	0.279	0.262	0.247	0.234	0.223		Paternal Genetic Effect (1 df)	0.322	0.298	0.273	0.261	0.247	0.234	0.222		Paternal Genetic Effect (1 df)	0.322	0.298	0.278	0.261	0.247	0.234	0.222		Paternal Genetic Effect (1 df)	0.05	0.05	0.05	0.05	0.05	0.05	0.05		Paternal Genetic Effect (1 df)	0.05	0.05	0.05	0.05	0.05	0.05	0.05		Paternal Genetic Effect (1 df)	0.322181	0.298634	0.278689	0.261605
Offspring Genetic Effect (1 df)	0.175	0.189	0.206	0.228	0.257	0.298	0.358		Offspring Genetic Effect (1 df)	0.175	0.188	0.205	0.227	0.256	0.297	0.357		Offspring Genetic Effect (1 df)	0.175	0.188	0.205	0.227	0.256	0.296	0.356		Offspring Genetic Effect (1 df)	0.175046	0.188429	0.205355	0.227273	0.256556	0.297333	0.35733		Offspring Genetic Effect (1 df)	0.174686	0.188007	0.204846	0.226634	0.255721	0.296183	0.355635		Offspring Genetic Effect (1 df)	0.1749	0.188265	0.205167	0.227048
Omnibus Test (3 df)	0.932	0.909	0.887	0.867	0.849	0.837	0.833		Omnibus Test (3 df)	0.358	0.344	0.337	0.336	0.342	0.359	0.39		Omnibus Test (3 df)	0.305	0.296	0.293	0.295	0.304	0.323	0.357		Omnibus Test (3 df)	0.740239	0.70575	0.677223	0.655336	0.641161	0.636709	0.646022		Omnibus Test (3 df)	0.12127	0.128918	0.138848	0.152052	0.170231	0.196512	0.237211		Omnibus Test (3 df)	0.628969	0.596965	0.572263	0.555072
Parental genotypes imputed (N = 2000 pairs; b2 = 0.1%; d2 = 0.1%; f2 = 0.1%; p = 0.5)									Parental genotypes imputed (N = 2000 pairs; b2 = 0.1%; d2 = 0.1%; f2 = 0.1%; p = 0.5; Maternal effect discordant with offspring and paternal effect)									Parental genotypes imputed (N = 2000 pairs; b2 = 0.1%; d2 = 0.1%; f2 = 0.1%; p = 0.5; Offspring effect discordant with maternal and paternal effect)									Parental genotypes imputed (N = 2000 pairs; b2 = 0.1%; d2 = 0.1%; p = 0.5)									Parental genotypes imputed (N = 2000 pairs; b2 = 0.1%; d2 = 0.1%; p = 0.5; Effects Discordant)									Parental genotypes imputed (N = 2000 pairs; b2 = 0.1%; f2 = 0.1%; p = 0.5)
Statistical Test	ψ2 = 0	ψ2 = 0.1	ψ2 = 0.2	ψ2 = 0.3	ψ2 = 0.4	ψ2 = 0.5	ψ2 = 0.6		Statistical Test	ψ2 = 0	ψ2 = 0.1	ψ2 = 0.2	ψ2 = 0.3	ψ2 = 0.4	ψ2 = 0.5	ψ2 = 0.6		Statistical Test	ψ2 = 0	ψ2 = 0.1	ψ2 = 0.2	ψ2 = 0.3	ψ2 = 0.4	ψ2 = 0.5	ψ2 = 0.6		Statistical Test	Rho = 0	Rho = 0.1	Rho = 0.2	Rho = 0.3	Rho = 0.4	Rho = 0.5	Rho = 0.6		Statistical Test	ψ2 = 0	ψ2 = 0.1	ψ2 = 0.2	ψ2 = 0.3	ψ2 = 0.4	ψ2 = 0.5	ψ2 = 0.6		Statistical Test	ψ2 = 0	ψ2 = 0.1	ψ2 = 0.2	ψ2 = 0.3
Maternal Genetic Effect (1 df)	0.15	0.152	0.154	0.157	0.159	0.162	0.165		Maternal Genetic Effect (1 df)	0.15	0.152	0.154	0.157	0.159	0.162	0.165		Maternal Genetic Effect (1 df)	0.15	0.152	0.154	0.157	0.159	0.162	0.165		Maternal Genetic Effect (1 df)	0.149854	0.151985	0.154273	0.156717	0.159322	0.162094	0.165043		Maternal Genetic Effect (1 df)	0.149593	0.151721	0.154004	0.156442	0.159038	0.1618	0.164738		Maternal Genetic Effect (1 df)	0.05	0.05	0.05	0.05
Paternal Genetic Effect (1 df)	0.314	0.292	0.274	0.258	0.2444	0.232	0.221		Paternal Genetic Effect (1 df)	0.313	0.292	0.273	0.257	0.244	0.231	0.221		Paternal Genetic Effect (1 df)	0.313	0.292	0.273	0.257	0.244	0.231	0.221		Paternal Genetic Effect (1 df)	0.05	0.05	0.05	0.05	0.05	0.05	0.05		Paternal Genetic Effect (1 df)	0.05	0.05	0.05	0.05	0.05	0.05	0.05		Paternal Genetic Effect (1 df)	0.313421	0.29188	0.273475	0.257588
Offspring Genetic Effect (1 df)	0.173	0.186	0.203	0.226	0.255	0.296	0.357		Offspring Genetic Effect (1 df)	0.172	0.186	0.203	0.225	0.254	0.295	0.355		Offspring Genetic Effect (1 df)	0.172	0.186	0.203	0.225	0.254	0.295	0.354		Offspring Genetic Effect (1 df)	0.172413	0.186032	0.203158	0.225249	0.254688	0.295615	0.355773		Offspring Genetic Effect (1 df)	0.172059	0.185615	0.202653	0.224613	0.253855	0.294466	0.354078		Offspring Genetic Effect (1 df)	0.172268	0.185869	0.20297	0.225024
Omnibus Test (3 df)	0.926	0.903	0.88	0.859	0.841	0.829	0.826		Omnibus Test (3 df)	0.373	0.359	0.35	0.348	0.354	0.369	0.4		Omnibus Test (3 df)	0.275	0.269	0.268	0.273	0.283	0.303	0.338		Omnibus Test (3 df)	0.740915	0.706424	0.677884	0.655975	0.641771	0.637283	0.646551		Omnibus Test (3 df)	0.122267	0.129837	0.139705	0.152859	0.170998	0.197246	0.237919		Omnibus Test (3 df)	0.622847	0.591099	0.566689	0.549809
Parental genotypes imputed (N = 2000 pairs; b2 = 0.1%; d2 = 0.1%; f2 = 0.1%; p = 0.9)									Parental genotypes imputed (N = 2000 pairs; b2 = 0.1%; d2 = 0.1%; f2 = 0.1%; p = 0.9; Maternal effect discordant with offspring and paternal effect)									Parental genotypes imputed (N = 2000 pairs; b2 = 0.1%; d2 = 0.1%; f2 = 0.1%; p = 0.9; Offspring effect discordant with maternal and paternal effect)									Parental genotypes imputed (N = 2000 pairs; b2 = 0.1%; d2 = 0.1%; p = 0.9)									Parental genotypes imputed (N = 2000 pairs; b2 = 0.1%; d2 = 0.1%; p = 0.9; Effects Discordant)									Parental genotypes imputed (N = 2000 pairs; b2 = 0.1%; f2 = 0.1%; p = 0.9)
Statistical Test	ψ2 = 0	ψ2 = 0.1	ψ2 = 0.2	ψ2 = 0.3	ψ2 = 0.4	ψ2 = 0.5	ψ2 = 0.6		Statistical Test	ψ2 = 0	ψ2 = 0.1	ψ2 = 0.2	ψ2 = 0.3	ψ2 = 0.4	ψ2 = 0.5	ψ2 = 0.6		Statistical Test	ψ2 = 0	ψ2 = 0.1	ψ2 = 0.2	ψ2 = 0.3	ψ2 = 0.4	ψ2 = 0.5	ψ2 = 0.6		Statistical Test	ψ2 = 0	ψ2 = 0.1	ψ2 = 0.2	ψ2 = 0.3	ψ2 = 0.4	ψ2 = 0.5	ψ2 = 0.6		Statistical Test	ψ2 = 0	ψ2 = 0.1	ψ2 = 0.2	ψ2 = 0.3	ψ2 = 0.4	ψ2 = 0.5	ψ2 = 0.6		Statistical Test	ψ2 = 0	ψ2 = 0.1	ψ2 = 0.2	ψ2 = 0.3
Maternal Genetic Effect (1 df)	0.147	0.149	0.151	0.153	0.155	0.158	0.161		Maternal Genetic Effect (1 df)	0.147	0.149	0.151	0.153	0.155	0.158	0.16		Maternal Genetic Effect (1 df)	0.147	0.149	0.151	0.153	0.155	0.158	0.16		Maternal Genetic Effect (1 df)	0.147184	0.148927	0.150873	0.153009	0.155333	0.157844	0.16055		Maternal Genetic Effect (1 df)	0.146931	0.148672	0.150614	0.152745	0.155061	0.157564	0.160259		Maternal Genetic Effect (1 df)	0.05	0.05	0.05	0.05
Paternal Genetic Effect (1 df)	0.323	0.299	0.279	0.262	0.247	0.234	0.223		Paternal Genetic Effect (1 df)	0.322	0.298	0.278	0.261	0.247	0.234	0.222		Paternal Genetic Effect (1 df)	0.322	0.298	0.278	0.261	0.247	0.234	0.222		Paternal Genetic Effect (1 df)	0.05	0.05	0.05	0.05	0.05	0.05	0.05		Paternal Genetic Effect (1 df)	0.05	0.05	0.05	0.05	0.05	0.05	0.05		Paternal Genetic Effect (1 df)	0.322181	0.298634	0.278689	0.261605
Offspring Genetic Effect (1 df)	0.175	0.189	0.206	0.228	0.257	0.298	0.358		Offspring Genetic Effect (1 df)	0.175	0.188	0.205	0.227	0.256	0.297	0.357		Offspring Genetic Effect (1 df)	0.175	0.188	0.205	0.227	0.256	0.296	0.356		Offspring Genetic Effect (1 df)	0.175046	0.188429	0.205355	0.227273	0.256556	0.297333	0.35733		Offspring Genetic Effect (1 df)	0.174686	0.188007	0.204846	0.226634	0.255721	0.296183	0.355635		Offspring Genetic Effect (1 df)	0.1749	0.188265	0.205167	0.227048
Omnibus Test (3 df)	0.932	0.909	0.887	0.867	0.849	0.837	0.833		Omnibus Test (3 df)	0.358	0.344	0.337	0.336	0.342	0.359	0.39		Omnibus Test (3 df)	0.305	0.296	0.293	0.295	0.304	0.323	0.357		Omnibus Test (3 df)	0.740239	0.70575	0.677223	0.655336	0.641161	0.636709	0.646022		Omnibus Test (3 df)	0.12127	0.128918	0.138848	0.152052	0.170231	0.196512	0.237211		Omnibus Test (3 df)	0.628969	0.596965	0.572263	0.555072
Parental genotypes imputed (N = 20000 pairs; b2 = 0.1%; d2 = 0.1%; f2 = 0.1%; p = 0.1)									Parental genotypes imputed (N = 20000 pairs; b2 = 0.1%; d2 = 0.1%; f2 = 0.1%; p = 0.1; Maternal effect discordant with offspring and paternal effect)									Parental genotypes imputed (N = 20000 pairs; b2 = 0.1%; d2 = 0.1%; f2 = 0.1%; p = 0.1; Offspring effect discordant with maternal and paternal effect)									Parental genotypes imputed (N = 20000 pairs; b2 = 0.1%; d2 = 0.1%; p = 0.1)									Parental genotypes imputed (N = 20000 pairs; b2 = 0.1%; d2 = 0.1%; p = 0.1; Effects Discordant)									Parental genotypes imputed (N = 20000 pairs; b2 = 0.1%; f2 = 0.1%; p = 0.1)
Statistical Test	ψ2 = 0	ψ2 = 0.1	ψ2 = 0.2	ψ2 = 0.3	ψ2 = 0.4	ψ2 = 0.5	ψ2 = 0.6		Statistical Test	ψ2 = 0	ψ2 = 0.1	ψ2 = 0.2	ψ2 = 0.3	ψ2 = 0.4	ψ2 = 0.5	ψ2 = 0.6		Statistical Test	ψ2 = 0	ψ2 = 0.1	ψ2 = 0.2	ψ2 = 0.3	ψ2 = 0.4	ψ2 = 0.5	ψ2 = 0.6		Statistical Test	ψ2 = 0	ψ2 = 0.1	ψ2 = 0.2	ψ2 = 0.3	ψ2 = 0.4	ψ2 = 0.5	ψ2 = 0.6		Statistical Test	ψ2 = 0	ψ2 = 0.1	ψ2 = 0.2	ψ2 = 0.3	ψ2 = 0.4	ψ2 = 0.5	ψ2 = 0.6		Statistical Test	ψ2 = 0	ψ2 = 0.1	ψ2 = 0.2	ψ2 = 0.3
Maternal Genetic Effect (1 df)	0.815	0.821	0.828	0.836	0.844	0.852	0.86		Maternal Genetic Effect (1 df)	0.814	0.82	0.827	0.835	0.843	0.851	0.859		Maternal Genetic Effect (1 df)	0.813	0.82	0.827	0.835	0.842	0.85	0.859		Maternal Genetic Effect (1 df)	0.814078	0.820641	0.827725	0.835218	0.843038	0.851117	0.859403		Maternal Genetic Effect (1 df)	0.813108	0.819694	0.826797	0.834307	0.842141	0.850233	0.858533		Maternal Genetic Effect (1 df)	0.05	0.05	0.05	0.05
Paternal Genetic Effect (1 df)	0.997	0.995	0.991	0.987	0.981	0.974	0.965		Paternal Genetic Effect (1 df)	0.997	0.995	0.991	0.986	0.981	0.973	0.965		Paternal Genetic Effect (1 df)	0.997	0.995	0.991	0.987	0.981	0.973	0.965		Paternal Genetic Effect (1 df)	0.05	0.05	0.05	0.05	0.05	0.05	0.05		Paternal Genetic Effect (1 df)	0.05	0.05	0.05	0.05	0.05	0.05	0.05		Paternal Genetic Effect (1 df)	0.997247	0.994827	0.991308	0.98659
Offspring Genetic Effect (1 df)	0.897	0.924	0.948	0.969	0.985	0.995	0.999		Offspring Genetic Effect (1 df)	0.897	0.923	0.948	0.969	0.985	0.995	0.999		Offspring Genetic Effect (1 df)	0.897	0.923	0.948	0.969	0.985	0.95	0.999		Offspring Genetic Effect (1 df)	0.897135	0.923527	0.947978	0.968912	0.984786	0.994647	0.998966		Offspring Genetic Effect (1 df)	0.896323	0.922802	0.947363	0.968435	0.984466	0.994483	0.998915		Offspring Genetic Effect (1 df)	0.896806	0.923247	0.947751	0.968744
Omnibus Test (3 df)	1	1	1	1	1	1	1		Omnibus Test (3 df)	1	1	1	1	1	1	1		Omnibus Test (3 df)	0.999	0.999	0.999	0.999	0.999	1	1		Omnibus Test (3 df)	1	1	1	1	1	1	1		Omnibus Test (3 df)	0.794817	0.834025	0.874833	0.914864	0.950705	0.978211	0.99415		Omnibus Test (3 df)	1	1	1	1
Parental genotypes imputed (N = 20000 pairs; b2 = 0.1%; d2 = 0.1%; f2 = 0.1%; p = 0.5)									Parental genotypes imputed (N = 20000 pairs; b2 = 0.1%; d2 = 0.1%; f2 = 0.1%; p = 0.5; Maternal effect discordant with offspring and paternal effect)									Parental genotypes imputed (N = 20000 pairs; b2 = 0.1%; d2 = 0.1%; f2 = 0.1%; p = 0.5; Offspring effect discordant with maternal and paternal effect)									Parental genotypes imputed (N = 20000 pairs; b2 = 0.1%; d2 = 0.1%; p = 0.5)									Parental genotypes imputed (N = 20000 pairs; b2 = 0.1%; d2 = 0.1%; p = 0.5; Effects Discordant)									Parental genotypes imputed (N = 20000 pairs; b2 = 0.1%; f2 = 0.1%; p = 0.5)
Statistical Test	ψ2 = 0	ψ2 = 0.1	ψ2 = 0.2	ψ2 = 0.3	ψ2 = 0.4	ψ2 = 0.5	ψ2 = 0.6		Statistical Test	ψ2 = 0	ψ2 = 0.1	ψ2 = 0.2	ψ2 = 0.3	ψ2 = 0.4	ψ2 = 0.5	ψ2 = 0.6		Statistical Test	ψ2 = 0	ψ2 = 0.1	ψ2 = 0.2	ψ2 = 0.3	ψ2 = 0.4	ψ2 = 0.5	ψ2 = 0.6		Statistical Test	ψ2 = 0	ψ2 = 0.1	ψ2 = 0.2	ψ2 = 0.3	ψ2 = 0.4	ψ2 = 0.5	ψ2 = 0.6		Statistical Test	ψ2 = 0	ψ2 = 0.1	ψ2 = 0.2	ψ2 = 0.3	ψ2 = 0.4	ψ2 = 0.5	ψ2 = 0.6		Statistical Test	ψ2 = 0	ψ2 = 0.1	ψ2 = 0.2	ψ2 = 0.3
Maternal Genetic Effect (1 df)	0.824	0.832	0.84	0.848	0.856	0.864	0.873		Maternal Genetic Effect (1 df)	0.824	0.831	0.839	0.847	0.855	0.863	0.872		Maternal Genetic Effect (1 df)	0.823	0.831	0.839	0.847	0.855	0.863	0.872		Maternal Genetic Effect (1 df)	0.824048	0.831663	0.839513	0.847538	0.855694	0.863943	0.872251		Maternal Genetic Effect (1 df)	0.823094	0.830735	0.838606	0.846651	0.854825	0.86309	0.871415		Maternal Genetic Effect (1 df)	0.05	0.05	0.05	0.05
Paternal Genetic Effect (1 df)	0.997	0.994	0.99	0.985	0.979	0.972	0.964		Paternal Genetic Effect (1 df)	0.996	0.994	1	0.985	0.979	0.972	0.964		Paternal Genetic Effect (1 df)	0.996	0.994	0.99	0.985	0.979	0.972	0.964		Paternal Genetic Effect (1 df)	0.05	0.05	0.05	0.05	0.05	0.05	0.05		Paternal Genetic Effect (1 df)	0.05	0.05	0.05	0.05	0.05	0.05	0.05		Paternal Genetic Effect (1 df)	0.996511	0.993824	0.990068	0.985172
Offspring Genetic Effect (1 df)	0.891	0.92	0.956	0.968	0.984	0.994	0.999		Offspring Genetic Effect (1 df)	0.891	0.919	0.945	0.967	0.984	0.994	0.999		Offspring Genetic Effect (1 df)	0.89	0.919	0.945	0.967	0.984	0.994	0.999		Offspring Genetic Effect (1 df)	0.891052	0.919314	0.945276	0.967374	0.984062	0.9944	0.998919		Offspring Genetic Effect (1 df)	0.89021	0.918559	0.944636	0.966877	0.983729	0.994228	0.998865		Offspring Genetic Effect (1 df)	0.890708	0.91902	0.94504	0.967199
Omnibus Test (3 df)	1	1	1	1	1	1	1		Omnibus Test (3 df)	1	1	1	1	1	1	1		Omnibus Test (3 df)	0.998	0.998	0.998	0.998	1	0.999	1		Omnibus Test (3 df)	1	1	1	1	1	1	1		Omnibus Test (3 df)	0.800354	0.838255	0.877884	0.916873	0.951845	0.978711	0.994285		Omnibus Test (3 df)	1	1	1	1
Parental genotypes imputed (N = 20000 pairs; b2 = 0.1%; d2 = 0.1%; f2 = 0.1%; p = 0.9)									Parental genotypes imputed (N = 20000 pairs; b2 = 0.1%; d2 = 0.1%; f2 = 0.1%; p = 0.9; Maternal effect discordant with offspring and paternal effect)									Parental genotypes imputed (N = 20000 pairs; b2 = 0.1%; d2 = 0.1%; f2 = 0.1%; p = 0.9; Offspring effect discordant with maternal and paternal effect)									Parental genotypes imputed (N = 20000 pairs; b2 = 0.1%; d2 = 0.1%; p = 0.9)									Parental genotypes imputed (N = 20000 pairs; b2 = 0.1%; d2 = 0.1%; p = 0.9; Effects Discordant)									Parental genotypes imputed (N = 20000 pairs; b2 = 0.1%; f2 = 0.1%; p = 0.9)
Statistical Test	ψ2 = 0	ψ2 = 0.1	ψ2 = 0.2	ψ2 = 0.3	ψ2 = 0.4	ψ2 = 0.5	ψ2 = 0.6		Statistical Test	ψ2 = 0	ψ2 = 0.1	ψ2 = 0.2	ψ2 = 0.3	ψ2 = 0.4	ψ2 = 0.5	ψ2 = 0.6		Statistical Test	ψ2 = 0	ψ2 = 0.1	ψ2 = 0.2	ψ2 = 0.3	ψ2 = 0.4	ψ2 = 0.5	ψ2 = 0.6		Statistical Test	ψ2 = 0	ψ2 = 0.1	ψ2 = 0.2	ψ2 = 0.3	ψ2 = 0.4	ψ2 = 0.5	ψ2 = 0.6		Statistical Test	ψ2 = 0	ψ2 = 0.1	ψ2 = 0.2	ψ2 = 0.3	ψ2 = 0.4	ψ2 = 0.5	ψ2 = 0.6		Statistical Test	ψ2 = 0	ψ2 = 0.1	ψ2 = 0.2	ψ2 = 0.3
Maternal Genetic Effect (1 df)	0.815	0.821	0.828	0.836	0.844	0.852	0.86		Maternal Genetic Effect (1 df)	0.814	0.82	0.827	0.835	0.843	0.851	0.859		Maternal Genetic Effect (1 df)	0.813	0.82	0.827	0.835	0.852	0.85	0.859		Maternal Genetic Effect (1 df)	0.814078	0.820641	0.827725	0.835218	0.843038	0.851117	0.859403		Maternal Genetic Effect (1 df)	0.813108	0.819694	0.826797	0.834307	0.842141	0.850233	0.858533		Maternal Genetic Effect (1 df)	0.05	0.05	0.05	0.05
Paternal Genetic Effect (1 df)	0.997	0.995	0.991	0.987	0.981	0.974	0.965		Paternal Genetic Effect (1 df)	0.997	0.995	0.991	0.986	0.981	0.973	0.965		Paternal Genetic Effect (1 df)	0.997	0.995	0.991	0.987	0.981	0.973	0.965		Paternal Genetic Effect (1 df)	0.05	0.05	0.05	0.05	0.05	0.05	0.05		Paternal Genetic Effect (1 df)	0.05	0.05	0.05	0.05	0.05	0.05	0.05		Paternal Genetic Effect (1 df)	0.997247	0.994827	0.991308	0.98659
Offspring Genetic Effect (1 df)	0.897	0.924	0.948	0.969	0.985	0.995	0.999		Offspring Genetic Effect (1 df)	0.897	0.923	0.948	0.969	0.985	0.995	0.999		Offspring Genetic Effect (1 df)	0.897	0.923	0.948	0.969	0.985	0.995	0.999		Offspring Genetic Effect (1 df)	0.897135	0.923527	0.947978	0.968912	0.984786	0.994647	0.998966		Offspring Genetic Effect (1 df)	0.896323	0.922802	0.947363	0.968435	0.984466	0.994483	0.998915		Offspring Genetic Effect (1 df)	0.896806	0.923247	0.947751	0.968744
Omnibus Test (3 df)	1	1	1	1	1	1	1		Omnibus Test (3 df)	1	1	1	1	1	1	1		Omnibus Test (3 df)	0.999	0.999	0.999	0.999	0.999	1	1		Omnibus Test (3 df)	1	1	1	1	1	1	1		Omnibus Test (3 df)	0.794817	0.834025	0.874833	0.914864	0.950705	0.978211	0.99415		Omnibus Test (3 df)	1	1	1	1
[truncated: 51 more columns]
